# Supplementary material for: A hydroxy-containing three dimensional covalent organic framework bearing silver nanoparticles for reduction of 4-nitrophenol and degradation of organic dyes
Source: Royal Society of Chemistry journal article supplement (doi:10.1039/d2nj02437c), 2022-01-01
Supplement: d2nj02437c1.pdf [file d2nj02437c1.pdf]

## Supporting Information

### **A hydroxy-containing three dimensional covalent organic framework bearing silver nanoparticles for reduction 4-nitrophenol and degradation organic dyes**

Juncao Huang,<sup>a</sup> Yuxin Tao,<sup>b</sup> Shuqin Ran,<sup>b</sup> Yujiao Yang,<sup>b</sup> Chaofan Li,<sup>a</sup> Peizhao Luo,<sup>b</sup> Ziao Chen<sup>c,\*</sup>, Xiaoping Tan,<sup>a,b,\*</sup>

<sup>a</sup> Chongqing Preschool Education College, Chongqing 404047, P. R. China.

<sup>b</sup> School of Chemistry and Chemical Engineering, Yangtze Normal University, Chongqing 408100, P. R. China.

<sup>c</sup> A State Key Laboratory of Structural Chemistry, Fujian Institute of Research on the Structure of Matter, Chinese Academy of Sciences, Fuzhou 350002, P. R. China.

#### **\*Corresponding Author**

E-mail: xptan@yznu.cn (X. Tan), chen-ziao@fjirsm.ac.cn (Z. Chen)

## **S1 Characterized instruments**

The crystallinity of prepared samples of 3D-COF and AgNPs-3D-COF were characterized by powder X-ray diffraction (PXRD) and recorded using a Bruker D8 Advance X-ray diffractometer at 40 kV and 40 mA over  $2^\circ$  to  $80^\circ$   $2\theta$  range with a Cu  $K\alpha$  radiation. The microstructures of the prepared materials 3D-COF and AgNPs-3D-COF were studied by scanning electron microscope (SEM) (AMRAY 1000B) and transmission electron micrographs images (TEM, JEM-2010). The porosity of 3D-COF and AgNPs-3D-COF were investigated by nitrogen adsorption–desorption isotherms measured at 77 K on an Autosorb IQ2 absorptiometer (Quantachrome Instruments). The thermostability of 3D-COF and AgNPs-3D-COF were measured by thermogravimetric analysis (TGA) carried out on a Netzsch STA449F3 analyzer under  $N_2$  atmosphere at a heating rate of  $10^\circ\text{C}/\text{min}$  from room temperature to  $800^\circ\text{C}$ . X-ray photoelectron spectroscopy (XPS) test was conducted to demonstrate the chemical component in an Escalab 250Xi instrument from Thermo Scientific equipped with an Al  $K\alpha$  microfocused X-ray source, and the C1s peak at 284.8 eV was used as internal standard. Solid-state nuclear magnetic resonance (NMR) experiments were conducted using an Agilent VNMRs 600 MHz NMR spectrometer at room temperature.

## **S2 Synthesis of AgNPs-3D-COF**

$\text{AgNO}_3$  aqueous solution (0.5 mL 5.0 mM) was added into the dispersion of 3D-COF (20.0 mL,  $2.5\text{ mg mL}^{-1}$ ) in deionized water (DW). The above mixture was continuously stirred for 15 min at room temperature. Subsequently,  $\text{NaBH}_4$  aqueous solution (1.0 mL, 50 mM) was poured into the aqueous dispersion of 3D-COF and  $\text{AgNO}_3$ , and the mixture was stirred for 10 min at room temperature. Finally, the reaction mixture was centrifuged (16 000 rpm, 30 min) two times and the generated solid was collected and washed with DW and ethanol two times. The treated solid was dried via lyophilization under vacuum to obtain pure AgNPs-3D-COF nanocomposite.

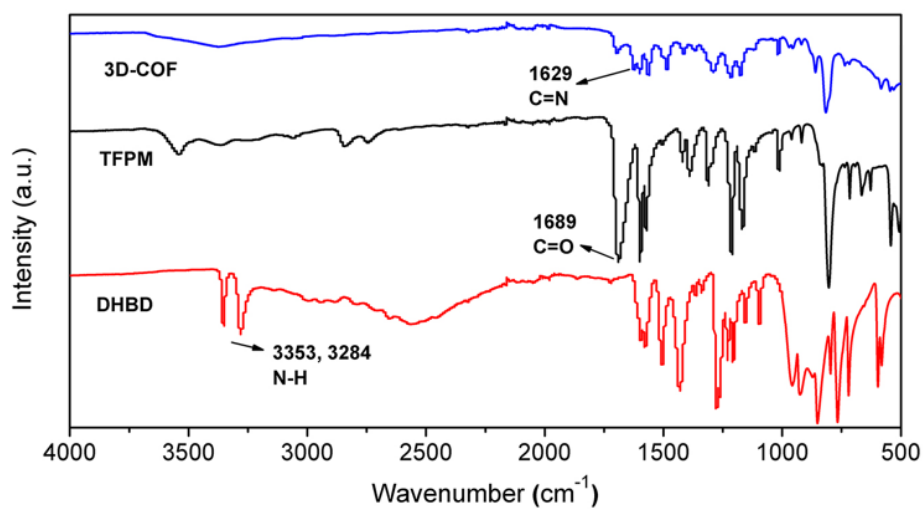

**Figure S1.** FTIR spectrum of 3D-COF and starting materials TFPM and DHBD.

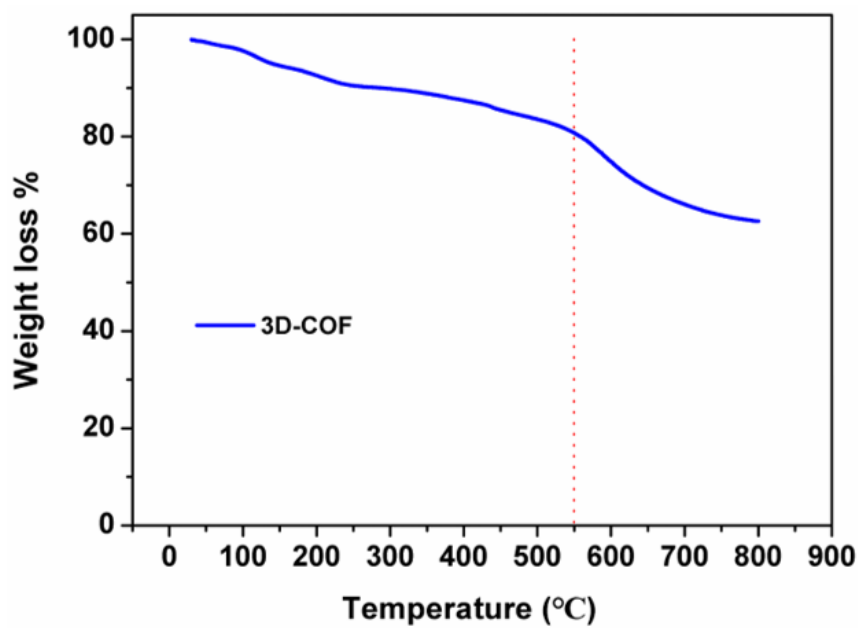

**Figure S2.** TGA curve of 3D-COF.

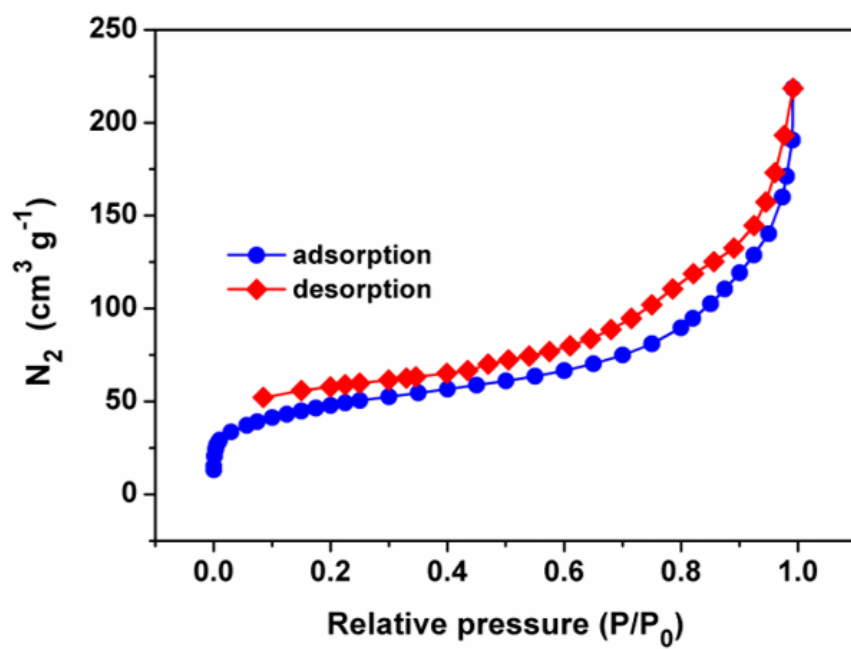

**Figure S3.**  $N_2$  adsorption-desorption isotherms for 3D-COF.

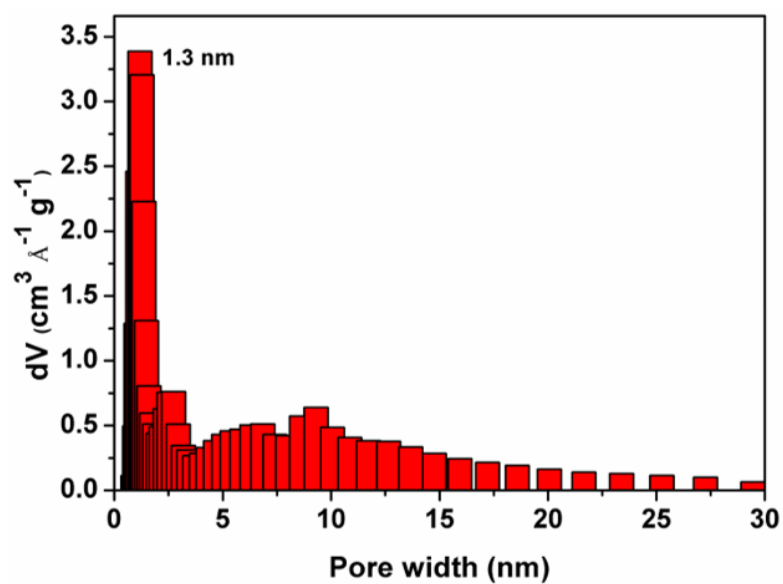

**Figure S4.** Pore-size distribution of 3D-COF.

**Figure S5.** High-resolution TEM image of AgNPs-3D-COF.

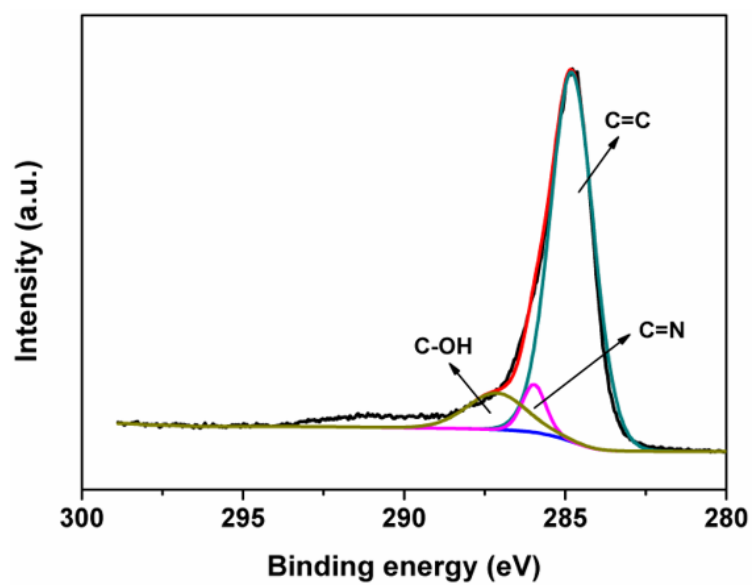

**Figure S6.** High-resolution C 1s XPS of 3D-COF.

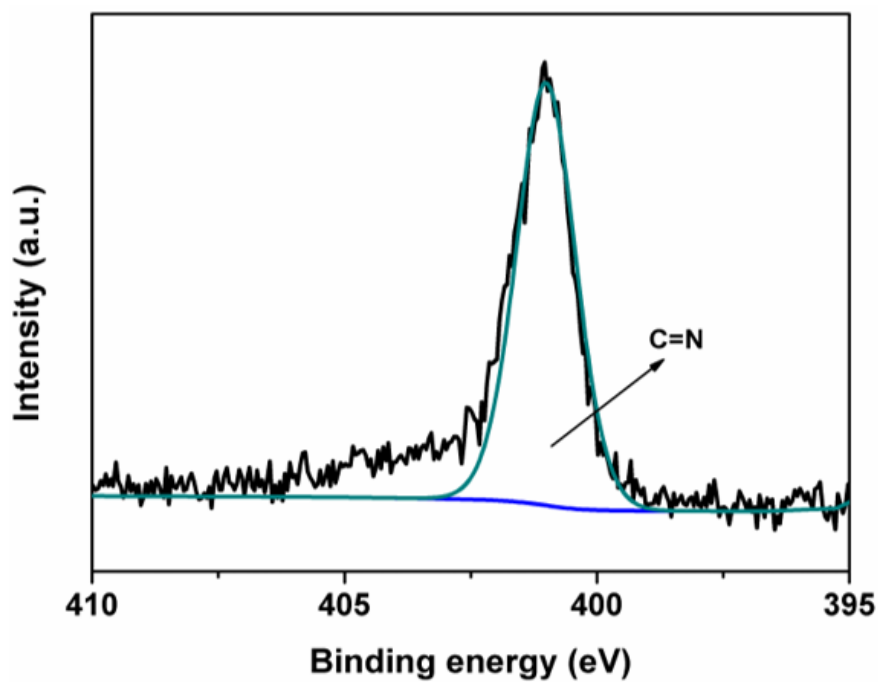

**Figure S7.** High-resolution N 1s XPS of 3D-COF.

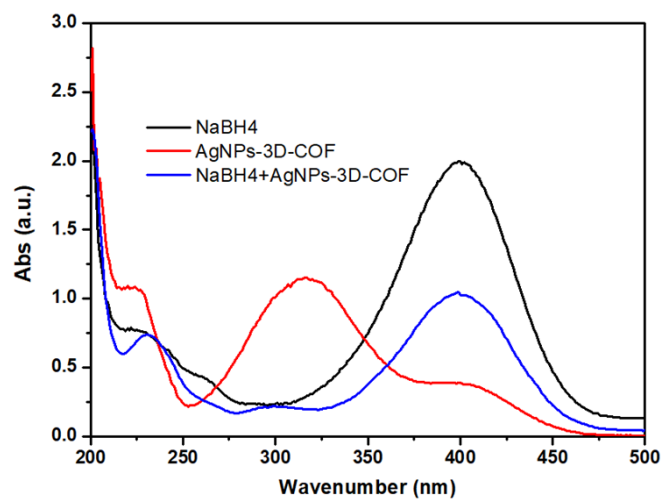

**Figure S8.** The UV-vis absorption spectra for catalytic reduction of 4-NP in the presence of NaBH<sub>4</sub>, AgNPs-3D-COF and NaBH<sub>4</sub> + AgNPs-3D-COF, respectively.

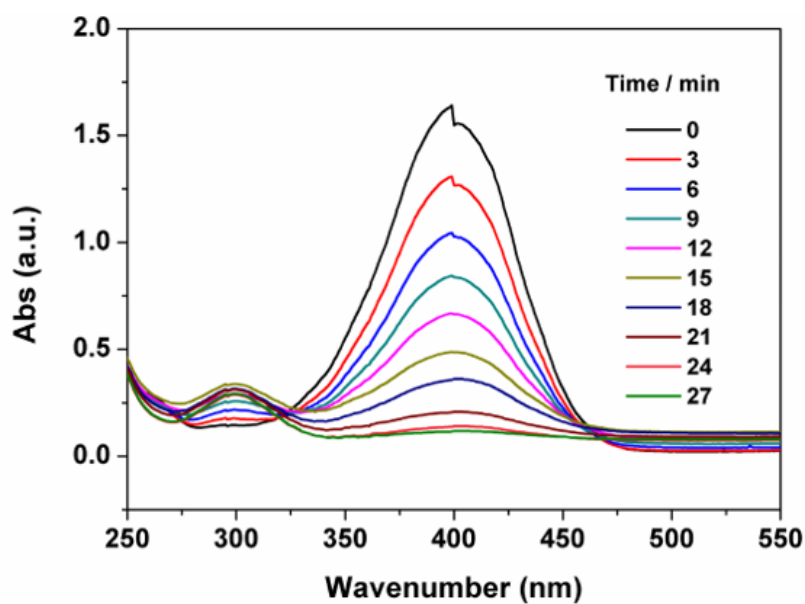

**Figure S9.** Time-dependent UV-vis absorption spectra for catalytic reduction of 4-NP in the presence of Pd/C catalyst.

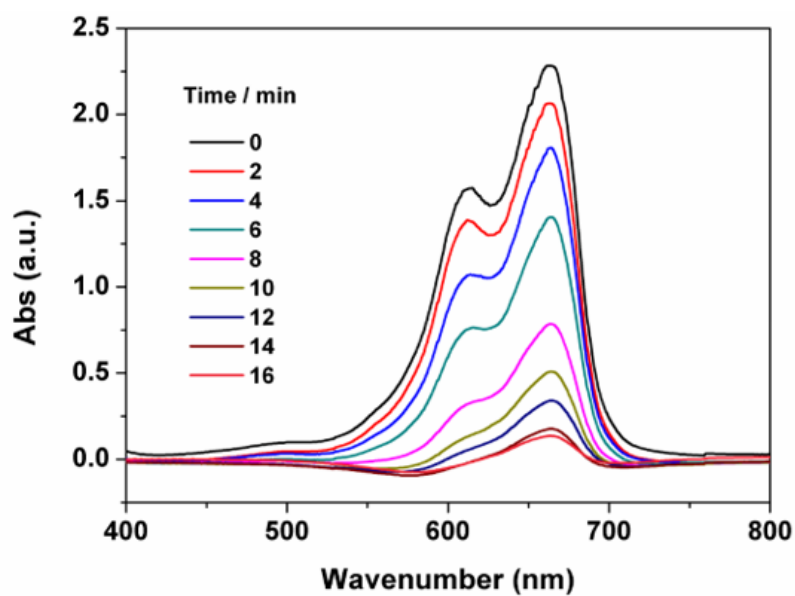

**Figure S10.** Time-dependent UV-vis absorption spectra for catalytic reduction of MB in the presence of Pd/C catalyst.

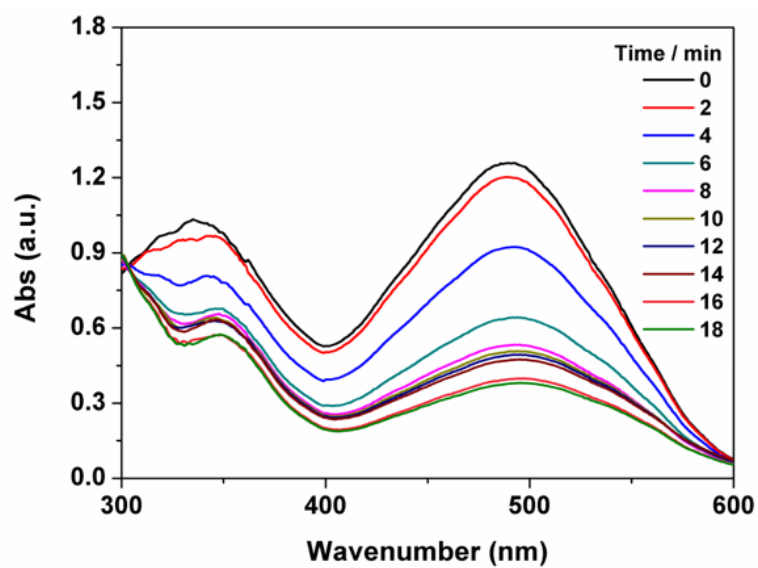

**Figure S11.** Time-dependent UV-vis absorption spectra for catalytic reduction of CR in the presence of Pd/C catalyst.

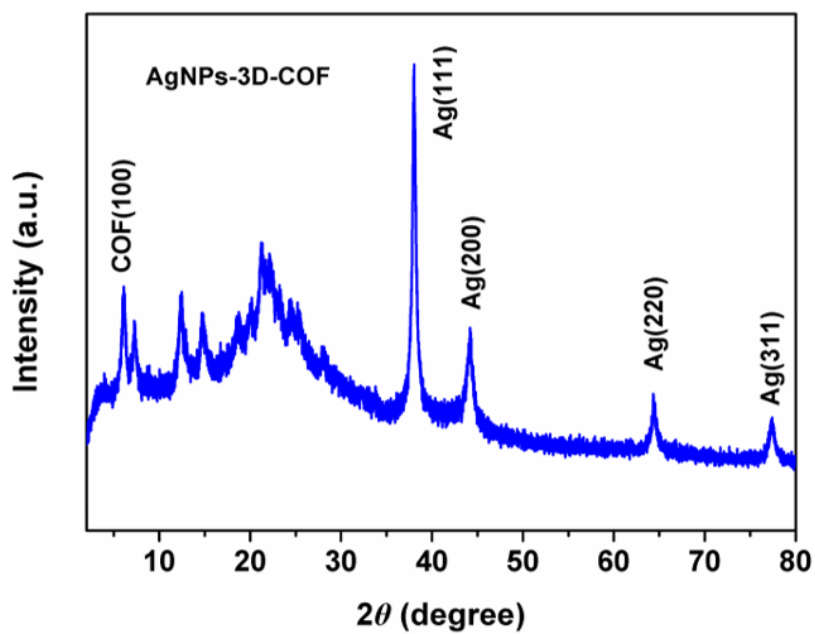

**Figure S12.** PXRD pattern of AgNPs-3D-COF after tests.

**Table S1.** Elements content of C, N, O and Ag

| Elements | C     | N    | O    | Ag   |
|----------|-------|------|------|------|
| wt%      | 78.74 | 5.25 | 7.48 | 8.53 |

**Table S2.** Comparison of the ability of various catalysts for catalyzing reduction 4-NP.

| Entry | Catalyst                                   | $k$ (min <sup>-1</sup> ) | References |
|-------|--------------------------------------------|--------------------------|------------|
| 1     | Ag@Pd-Ag nanocubes                         | 1.69                     | [1]        |
| 2     | Ag@Ag-Pd NFs                               | 1.28                     | [2]        |
| 3     | Ag@PEDOT                                   | 0.66                     | [3]        |
| 4     | Au@Ag@PDA                                  | 0.5                      | [4]        |
| 5     | Ag-Au-rGO                                  | 2.08                     | [5]        |
| 6     | Au@Ag/MOF                                  | 2.98                     | [6]        |
| 7     | Ag <sup>0</sup> @CMP                       | 0.08                     | [7]        |
| 8     | Fe <sub>3</sub> O <sub>4</sub> @PPy-MAA/Ag | 0.17                     | [8]        |
| 9     | AgNPs-3D-COF                               | 2.99                     | This work  |

**References:**

- 1 J. M. Li, J. Y. Liu, Y. Yang and D. Qin, *J. Am. Chem. Soc.*, 2015, **137**, 7039-7042.
- 2 J. M. Li, X. J. Sun and D. Qin, *ChemNanoMat*, 2016, **2**, 494-499.
- 3 Y. Y. Xia and L. Xu, *Synth. Met.*, 2010, **160**, 545-548.
- 4 J. Li, C. Y. Liu and Y. Liu, *J. Mater. Chem.*, 2012, **22**, 8426-8430.
- 5 X. Wu, C. Lu, Z. Zhou, G. Yuan, R. Xiong and X. Zhang, *Environ. Sci.: Nano*, 2014, **1**, 71-79.
- 6 P. Fageria, S. Uppala, R. Nazir, S. Gangopadhyay, C. H. Chang, M. Basu, S. Pande, *Langmuir*, 2016, **32**, 10054-10064.

7 H. L. Cao, H. B. Huang, Z. Chen, B. Karadeniz, J. Lü and R. Cao, *ACS Appl. Mater. Interfaces*, 2017, **9**, 5231-5236.

8 R. Das, V. S. Sypu, H. K. Paumo, M. Bhaumik, V. Maharaj, A. Maity, *Appl. Catal., B*, 2019, **244**, 546-558.
